# Supplementary material for: Developing Ni0.5Zn0.5Fe2O4 ferrite with controlled particle size and morphology through optimized processing conditions of low energy solid state reaction
Source: Royal Society of Chemistry journal article supplement (doi:10.1039/d4ra07076c), 2024-01-01
Supplement: d4ra07076c1.pdf [file d4ra07076c1.pdf]

1 **Developing  $\text{Ni}_{0.5}\text{Zn}_{0.5}\text{Fe}_2\text{O}_4$  Ferrite with Controlled Particle Size**  
2 **and Morphology Through Optimized Processing Conditions of**  
3 **low energy solid state reaction**

4 Sarah BAAYYAD<sup>1</sup>. Fatima-Zahra SEMLALI<sup>1</sup>. El Kébir HLIL<sup>3</sup>. Tarik MAHFOUD<sup>2</sup>. Hassan  
5 EL MOUSSAOUI<sup>2\*</sup>. Mounir EL ACHABY<sup>1\*</sup>

6 <sup>1</sup>Materials Science. Energy and Nanoengineering Department (MSN). Mohammed VI Polytechnic  
7 University (UM6P). Lot 660 – Hay Moulay Rachid. 43150. Ben Guerir. Morocco.

8 <sup>2</sup>Moroccan Foundation for Advanced Science. Innovation and Research (MAScIR). Rabat Design  
9 Center. Rue Mohamed El Jazouli. Madinat El Irfane. 10100 Rabat. Morocco.

10 <sup>3</sup> Institut Néel. CNRS et Université Joseph Fourier. BP 166. F-38042 Grenoble cedex 9. France.

11  
12 \*Corresponding author: Email: [mounir.elachaby@um6p.ma](mailto:mounir.elachaby@um6p.ma). (M. El Achaby)

13 \*Corresponding author: Email: [h.elmoussaoui@mascir.ma](mailto:h.elmoussaoui@mascir.ma). (H. El Moussaoui)

28 **I. Results and discussion**

29

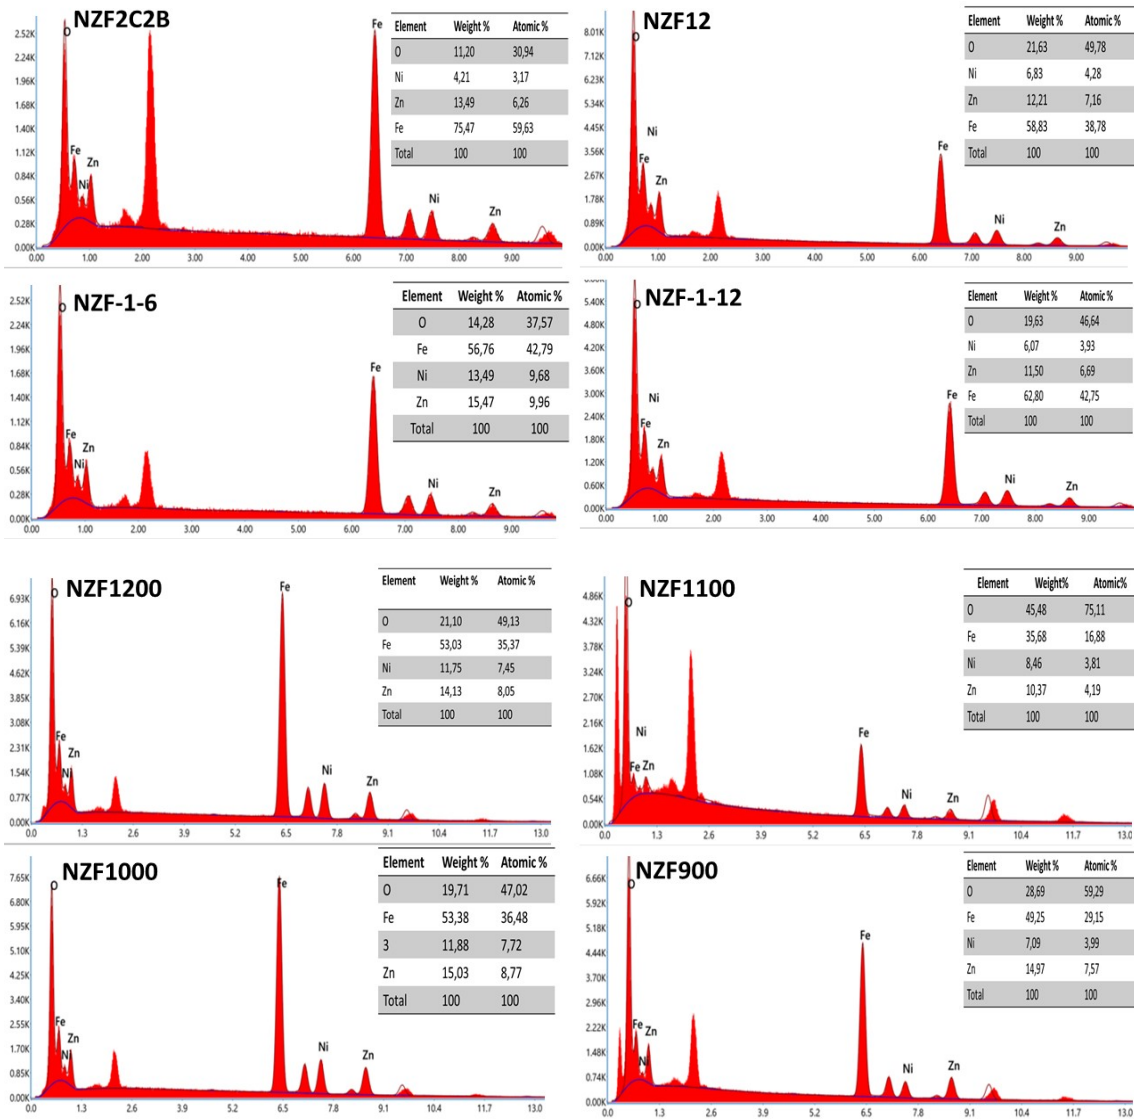

32 **Fig. S1: EDS elemental spectrum and quantification results**

33

34

35

36

37

38

39

40

41 **Table S1:** Summary overview of magnetic parameters of nickel zinc ferrite ( $\text{Ni}_{0.5}\text{Zn}_{0.5}\text{Fe}_2\text{O}_4$ )  
 42 particles.

43

| <b>Sample's<br/>number</b> | <b>Samples</b>  | <b>Ms</b> | <b>Mr</b> | <b>Hc</b> | <b>R</b> | <b>Tc</b> | <b>Mr/Ms</b> |
|----------------------------|-----------------|-----------|-----------|-----------|----------|-----------|--------------|
| <b>1</b>                   | <b>NZF 2C2B</b> | 75.65     | 4.83      | 0.20      | 0.063    | 530.90    | 0.063        |
| <b>2</b>                   | <b>NZF C12</b>  | 76.90     | 5.81      | 0.06      | 0.075    | 541.12    | 0.075        |
| <b>3</b>                   | <b>NZF-1-6</b>  | 76.10     | 0.78      | 0.02      | 0.010    | 539.62    | 0.010        |
| <b>4</b>                   | <b>NZF-1-12</b> | 64.88     | 4.47      | 0.04      | 0.068    | 541.56    | 0.068        |
| <b>5</b>                   | <b>NZF 1200</b> | 80.07     | 5.36      | 0.03      | 0.066    | 539.33    | 0.066        |
| <b>6</b>                   | <b>NZF 1100</b> | 70.72     | 7.39      | 0.08      | 0.104    | 473.45    | 0.104        |
| <b>7</b>                   | <b>NZF 1000</b> | 29.68     | 1.72      | 0.04      | 0.057    | 444.33    | 0.057        |
| <b>8</b>                   | <b>NZF 900</b>  | 40.66     | 2.49      | 0.08      | 0.061    | 836.89    | 0.061        |

44
